# Supplementary material
Source: Springer Nature journal article supplement (https://www.springermedizin.de/resource/supplementary/13018_2008_95_MOESM3_ESM.pdf/9636310)

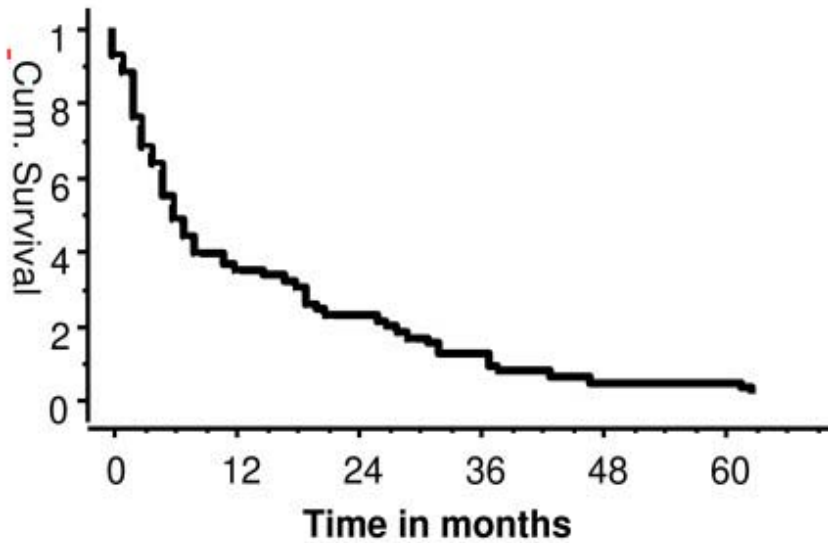

Supplement: MOESM3 [file 9636310]
